# Supplementary material for: Flexible control of Co/Zn–nitrogen coordination in ZIFs for electrochemical CO2 reduction to tunable syngas
Source: Royal Society of Chemistry journal article supplement (doi:10.1039/d4cc04624b), 2024-01-01
Supplement: d4cc04624b1.pdf [file d4cc04624b1.pdf]

***Supporting Information***

**Flexible control of Co/Zn-nitrogen coordination in ZIFs for  
electrochemical CO<sub>2</sub> reduction to tunable syngas**

Yanjun Liu and Ning Yuan\*

School of Chemical and Environmental Engineering, China University of Mining and  
Technology, Beijing 100083, China

\*Corresponding Author: Ning Yuan, E-mail address: ning.yuan@cumtb.edu.cn

## Materials and methods

### Materials

$\text{Co}(\text{NO}_3)_2 \cdot 6\text{H}_2\text{O}$  was purchased from Beijing Shuanghuan Chemical Reagent Factory, 2-methylimidazole was purchased from Shanghai Titan Technology Co., Ltd.,  $\text{Zn}(\text{NO}_3)_2 \cdot 6\text{H}_2\text{O}$  was purchased from Shanghai Aladdin Biochemical Technology Co., Ltd., and anhydrous methanol was purchased from Beijing Modern Oriental Fine Chemical Co., Ltd. All solvents can be used without further purification.

### Synthesis of catalyst

$\text{Zn}(\text{NO}_3)_2 \cdot 6\text{H}_2\text{O}$  was combined with  $\text{Co}(\text{NO}_3)_2 \cdot 6\text{H}_2\text{O}$  in 7.5 mL of methanol, with amounts of 1.0, 0.75, 0.5, 0.25 and 0 mmol for  $\text{Zn}(\text{NO}_3)_2 \cdot 6\text{H}_2\text{O}$  and 0, 0.25, 0.5, 0.75 and 1.0 mmol for  $\text{Co}(\text{NO}_3)_2 \cdot 6\text{H}_2\text{O}$ . Then, 3.64 mmol of 2-methylimidazole was dissolved in 7.5 mL of methanol and quickly poured into the above solution while stirring at room temperature for 10 hours to prepare  $\text{Co}_0\text{Zn}_1\text{-ZIF}$ ,  $\text{Co}_{0.25}\text{Zn}_{0.75}\text{-ZIF}$ ,  $\text{Co}_{0.5}\text{Zn}_{0.5}\text{-ZIF}$ ,  $\text{Co}_1\text{Zn}_0\text{-ZIF}$  and  $\text{Co}_{0.75}\text{Zn}_{0.25}\text{-ZIF}$ , respectively. The resulting precipitate was centrifuged, washed three times with methanol, and dried overnight at 80 °C.

### Catalyst characterization methods

The surface morphology and size of the sample before and after electrocatalysis were analyzed using a scanning electron microscope (SEM) (ZEISS Gemini 300). The corresponding elemental distribution map was obtained using an energy-dispersive spectrometer (EDS) (OXFORD XPLORE30). Fine structural analysis was performed using a scanning transmission electron microscope (STEM) (JEM-2100F). X-ray diffraction (XRD) data were collected using a Bruker D8-Advance diffractometer with  $\text{Cu-K}\alpha$  radiation as the X-ray source. The molecular structures and functional groups of the obtained samples were identified using a Fourier Transform Infrared Spectrometer (FTIR) (Thermo Scientific Nicolet iS20) within the scan range 4000–400  $\text{cm}^{-1}$ . UV-Vis diffuse reflectance spectra were performed on an Agilent Cary 5000 spectrophotometer. X-ray photoelectron spectroscopy (XPS) was carried out using the Thermo Scientific K-Alpha instrument with  $\text{Al K}\alpha$  radiation as the X-ray source. The elemental composition was determined using an Inductively Coupled Plasma Optical

Emission Spectrometer (ICP-OES) (Agilent 5800). N<sub>2</sub> adsorption-desorption experiments were performed using the BELSORP-Max automatic analyzer. The CO<sub>2</sub> adsorption experiments were measured using the Quanta AUTOSORB IQ automatic analyzer. The nitrogen content in the samples was analyzed using the Elementar vario Micro cube elemental analyzer.

### **Electrochemical measurement**

The catalyst (10 mg) and carbon black (5 mg) were dispersed in 50  $\mu$ L of a 5 wt% Nafion solution, 500  $\mu$ L of ethanol and 500  $\mu$ L of deionized water. The mixture was subjected to ultrasonic treatment for 30 minutes. Next, 50  $\mu$ L of the homogenized catalyst ink was meticulously applied to a 1 $\times$ 1 cm<sup>2</sup> piece of SGL28BC hydrophobic carbon paper, after which the carbon paper was allowed to be dried.

The electrochemical experiment was conducted by an electrochemical workstation (DH7000) in an H-type electrolytic cell, which was divided into cathode and anode compartments by a Nafion117 proton exchange membrane. The CO<sub>2</sub>RR was carried out in a three-electrode system, consisting of a working electrode, a counter electrode, and a reference electrode. The working electrode and the reference electrode (saturated calomel electrode) were placed in the cathode compartment, while the counter electrode (platinum mesh: 1 cm<sup>2</sup>) was positioned in the anode compartment. The Linear Sweep Voltammetry (LSV) test was performed at a scanning frequency of 10 mV s<sup>-1</sup>.

For the ECSA-normalized LSV curves, the specific capacitance for a flat surface typically ranges from 20 to 60  $\mu$ F cm<sup>-2</sup>. Therefore, we used a value of 40  $\mu$ F cm<sup>-2</sup> for our ECSA calculations.<sup>1</sup> The ECSA values for Co<sub>0</sub>Zn<sub>1</sub>-ZIF, Co<sub>0.25</sub>Zn<sub>0.75</sub>-ZIF, Co<sub>0.5</sub>Zn<sub>0.5</sub>-ZIF, Co<sub>0.75</sub>Zn<sub>0.25</sub>-ZIF and Co<sub>1</sub>Zn<sub>0</sub>-ZIF were 78, 92.5, 113.5, 176 and 46.5 cm<sup>2</sup>, respectively.

Electrochemical impedance spectroscopy (EIS) was obtained by applying an AC voltage with an amplitude of 5 mV in the frequency range of 10<sup>5</sup> Hz to 0.1 Hz. Nyquist plots were obtained at 0 V and -0.65 V (vs. RHE). Cyclic voltammetry (CV) tests with different sweep speeds were performed in an Ar-saturated 0.5M KHCO<sub>3</sub> solution without the Faradaic process, and the double-layer capacitance was

calculated after linear fitting. The gas product CO and H<sub>2</sub> generated during the CO<sub>2</sub>RR process were detected using GC (Agilent 990). The liquid product was analyzed using Nuclear Magnetic Resonance spectroscopy (NMR) (Bruker AVANCE NEO 400M), with dimethyl sulfoxide (DMSO) employed as the internal standard. No liquid product was observed in this analysis. At 0.5 M KHCO<sub>3</sub> saturated with CO<sub>2</sub> (pH ≈ 7.2) and Ar (pH ≈ 8.8), the saturated calomel electrode (SCE) reference electrode was converted to a reversible hydrogen electrode (RHE) scale using the following equation: <sup>2</sup>

$$E \text{ (vs. RHE)} = E \text{ (vs. SCE)} + 0.222 \text{ V} + 0.0592 \times \text{pH} \quad (1)$$

To evaluate the selectivity of the electrocatalysts, the Faradaic efficiency (FE) was calculated as follows: <sup>3</sup>

$$\text{FE} = \frac{N \times F \times n_p}{I_t \times t} \quad (2)$$

$N$  represents the electron transfer number for a specific product,  $F$  represents the Faradaic constant (96485 C mol<sup>-1</sup>),  $n_p$  represents the molar of product,  $I_t$  and  $t$  represent the total current and time, respectively.

TOF quantified the intrinsic electrical activity of the catalyst, the calculation formula was as follows: <sup>2,4</sup>

$$\text{TOF (h}^{-1}\text{)} = \frac{j_{\text{product}} / NF}{m_{\text{catalyst}} \times (W_m / M_m)} \times 3600 \quad (3)$$

$j_{\text{product}}$  represents the product partial current density,  $N$  represents the electron transfer number for a specific product,  $F$  represents the Faradaic constant (96485 C mol<sup>-1</sup>),  $m_{\text{catalyst}}$  is the catalyst loading on the electrode,  $W_m$  is the metal loading in the catalyst, and  $M_m$  is the atomic mass of the metal.

## Characterization

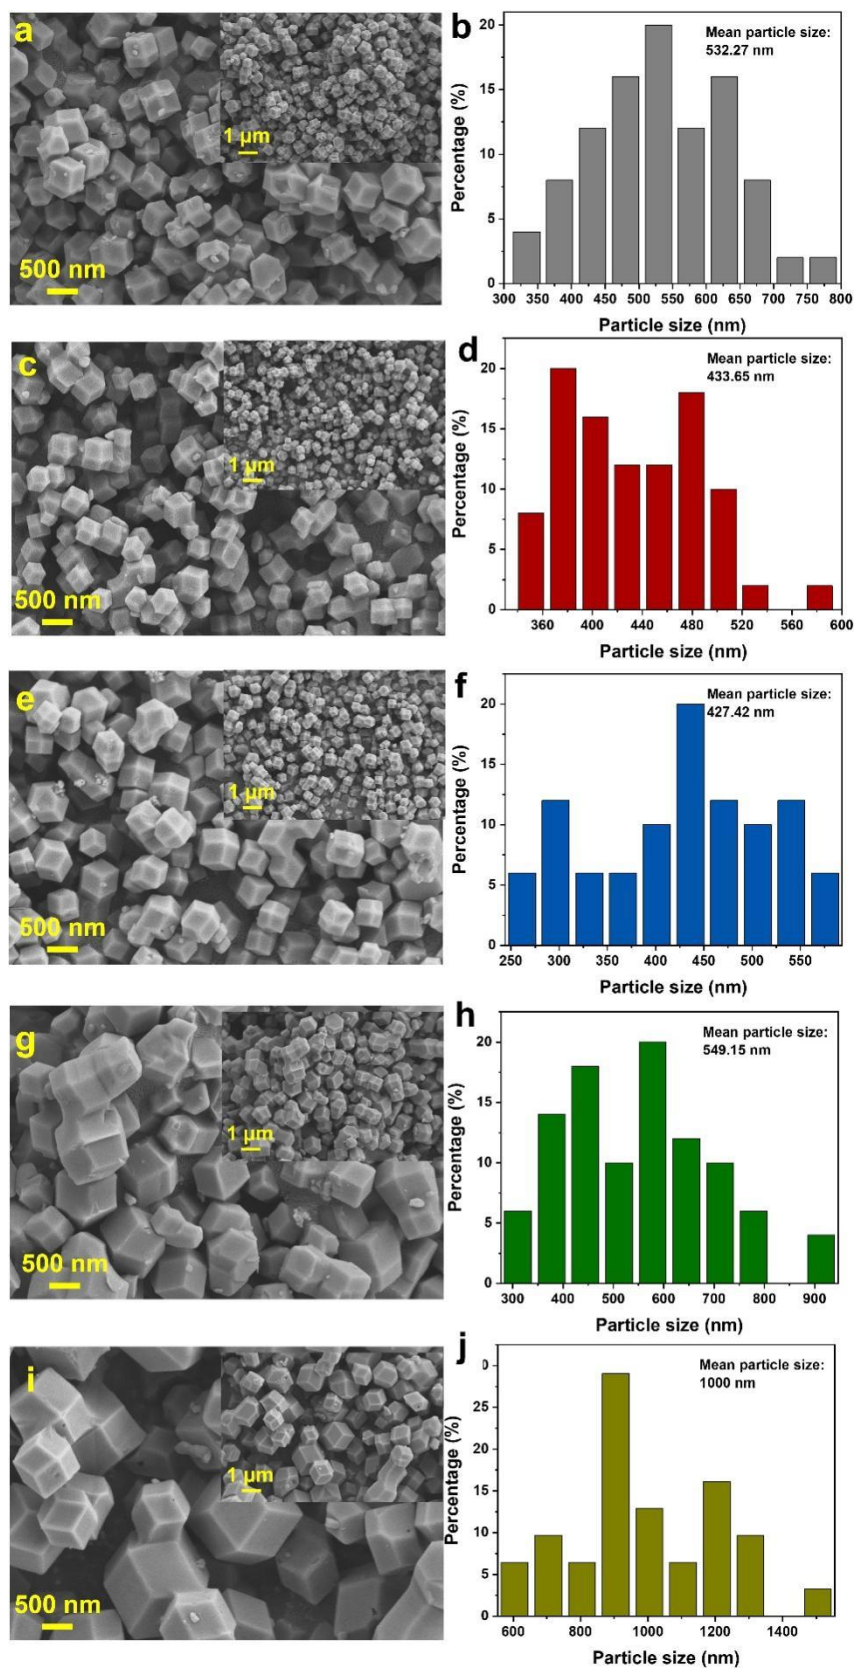

**Fig. S1** SEM images and statistical graphs of particle sizes of (a and b)  $\text{Co}_0\text{Zn}_1\text{-ZIF}$ , (c and d)  $\text{Co}_{0.25}\text{Zn}_{0.75}\text{-ZIF}$ , (e and f)  $\text{Co}_{0.5}\text{Zn}_{0.5}\text{-ZIF}$ , (g and h)  $\text{Co}_{0.75}\text{Zn}_{0.25}\text{-ZIF}$  and (i and j)  $\text{Co}_1\text{Zn}_0\text{-ZIF}$ .

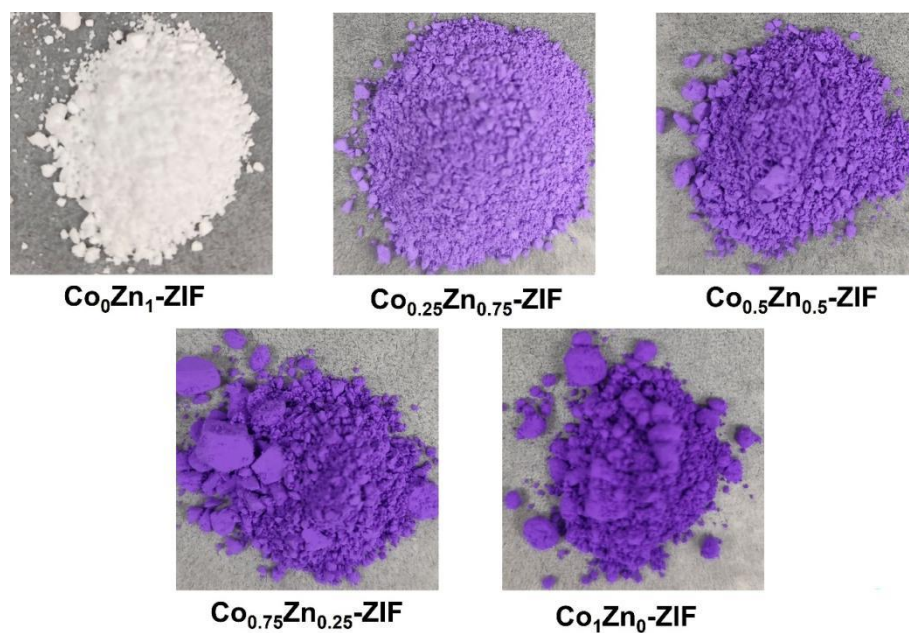

**Fig. S2** Photos of  $\text{Co}_x\text{Zn}_y\text{-ZIF}$ .

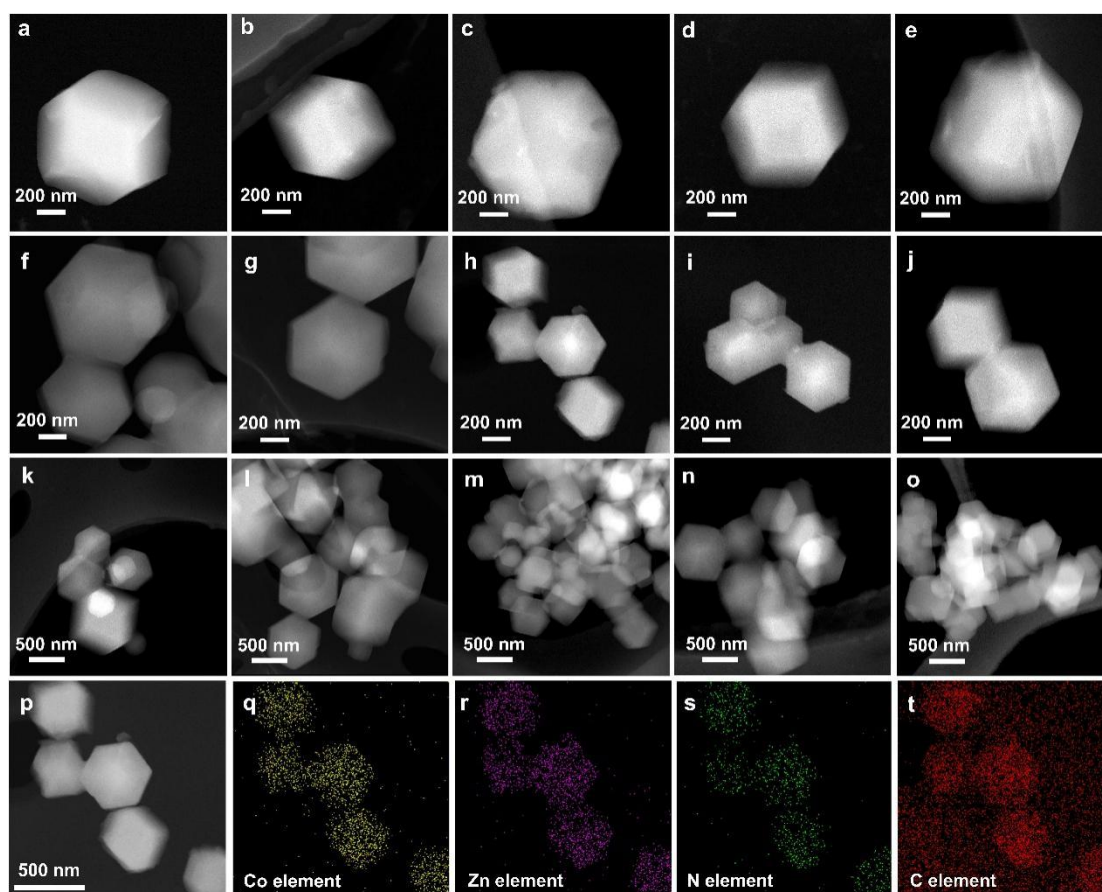

**Fig. S3** STEM images  $\text{Co}_x\text{Zn}_y\text{-ZIF}$  (a, f and k)  $\text{Co}_0\text{Zn}_1\text{-ZIF}$ , (b, g and l)  $\text{Co}_{0.25}\text{Zn}_{0.75}\text{-ZIF}$ , (c, h and m)  $\text{Co}_{0.5}\text{Zn}_{0.5}\text{-ZIF}$ , (d, i and n)  $\text{Co}_{0.75}\text{Zn}_{0.25}\text{-ZIF}$ , (e, j and o)  $\text{Co}_1\text{Zn}_0\text{-ZIF}$  and (p-t) EDS element distribution images of  $\text{Co}_{0.5}\text{Zn}_{0.5}\text{-ZIF}$ .



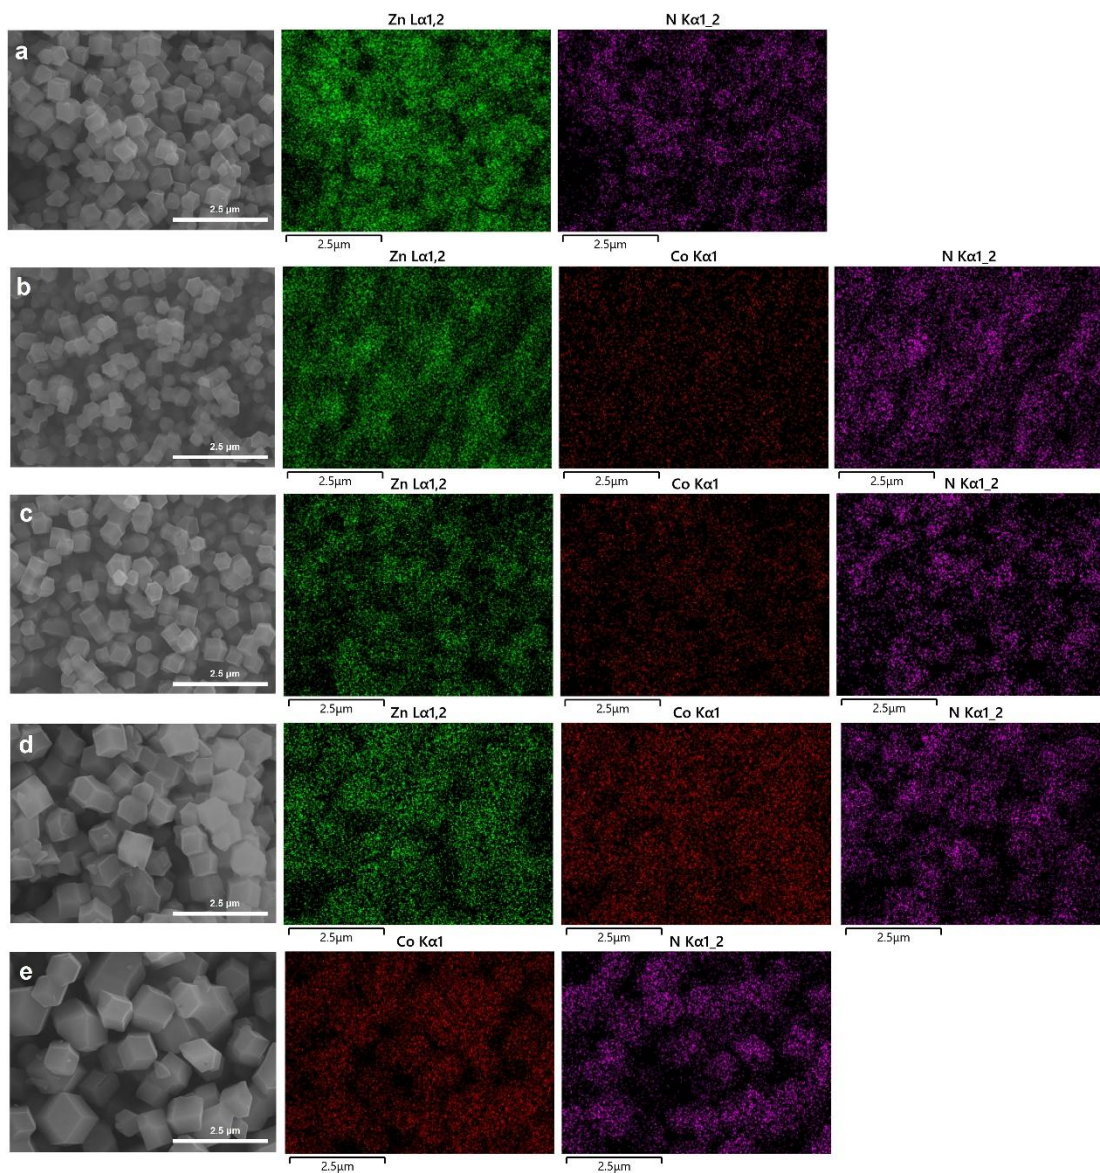

**Fig. S4** SEM and EDS element distribution images of Co<sub>x</sub>Zn<sub>y</sub>-ZIF (a) Co<sub>0</sub>Zn<sub>1</sub>-ZIF, (b) Co<sub>0.25</sub>Zn<sub>0.75</sub>-ZIF, (c) Co<sub>0.5</sub>Zn<sub>0.5</sub>-ZIF, (d) Co<sub>0.75</sub>Zn<sub>0.25</sub>-ZIF and (e) Co<sub>1</sub>Zn<sub>0</sub>-ZIF.

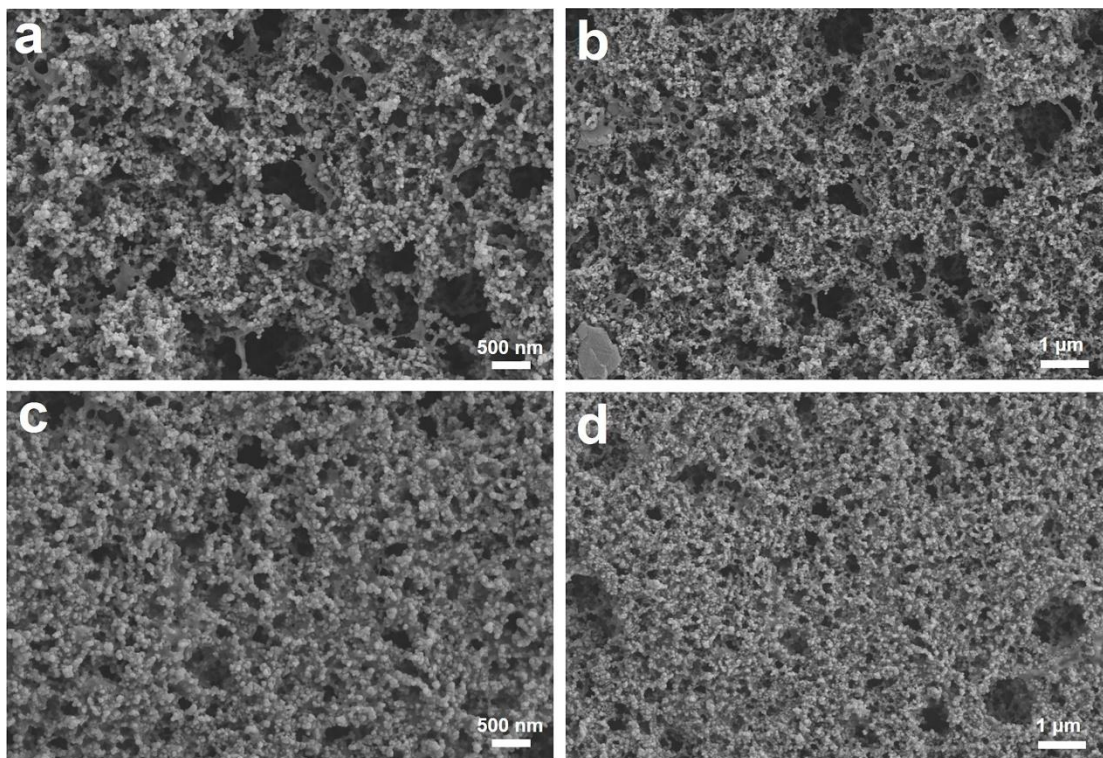

**Fig. S5** SEM images of  $\text{Co}_{0.5}\text{Zn}_{0.5}\text{-ZIF}$  (a, b) after electrolysis at  $-1.3$  V vs. RHE for 1.5 hours and (c, d) after electrolysis at  $-1.3$  V vs. RHE for 10 hours.

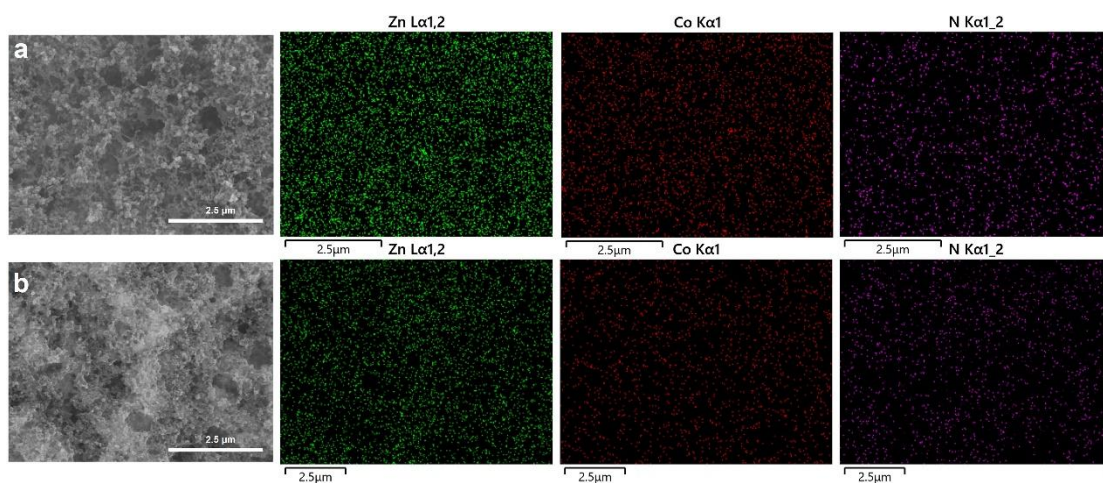

**Fig. S6** SEM images and EDS element distribution of  $\text{Co}_{0.5}\text{Zn}_{0.5}\text{-ZIF}$ : (a) after electrolysis at  $-1.3$  V vs. RHE for 1.5 hours and (b) after electrolysis at  $-1.3$  V vs. RHE for 10 hours.



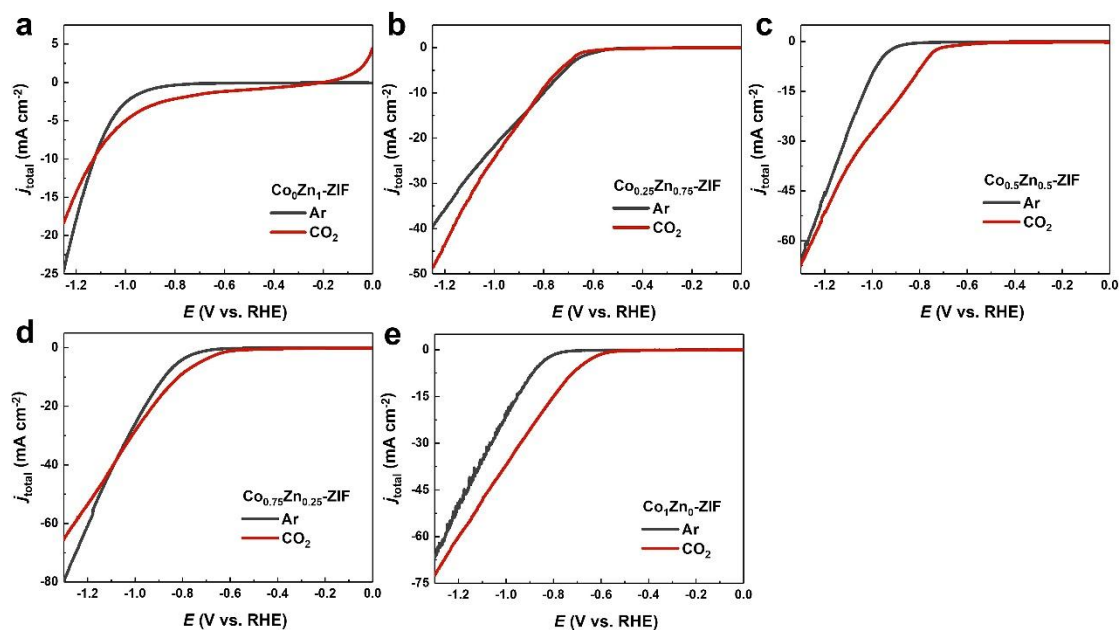

**Fig. S7** LSV curves of  $\text{Co}_x\text{Zn}_y\text{-ZIF}$  in 0.5 M  $\text{KHCO}_3$  electrolyte purged by  $\text{CO}_2$  and Ar.

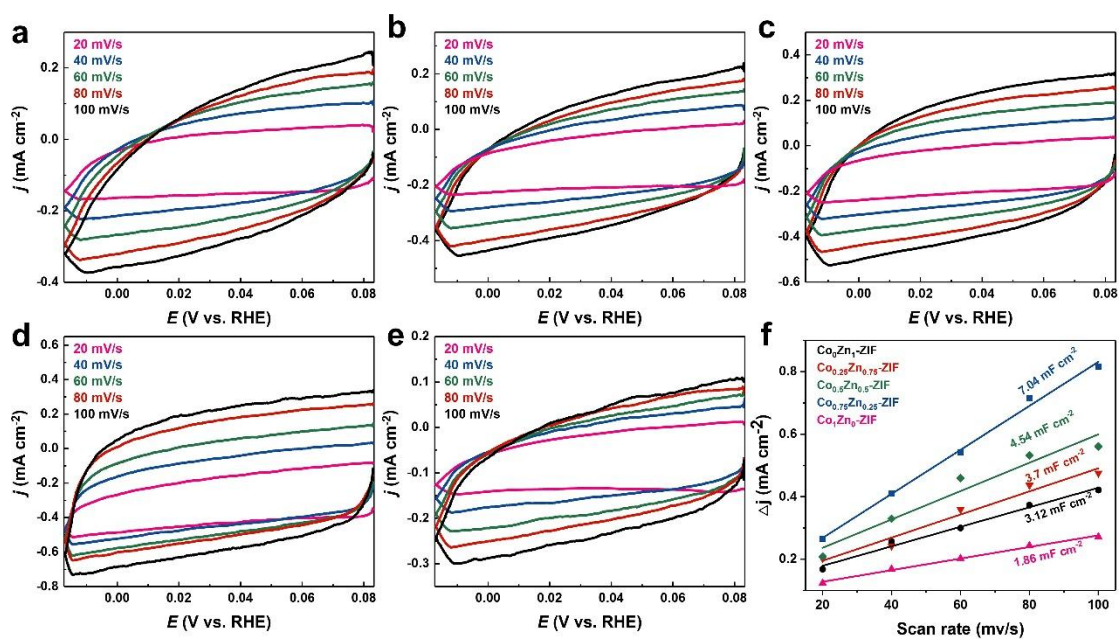

**Fig. S8** CV plots of (a)  $\text{Co}_0\text{Zn}_1\text{-ZIF}$ , (b)  $\text{Co}_{0.25}\text{Zn}_{0.75}\text{-ZIF}$ , (c)  $\text{Co}_{0.5}\text{Zn}_{0.5}\text{-ZIF}$ , (d)  $\text{Co}_{0.75}\text{Zn}_{0.25}\text{-ZIF}$ , (e)  $\text{Co}_1\text{Zn}_0\text{-ZIF}$  and (f)  $C_{dl}$  values under different scanning rates.

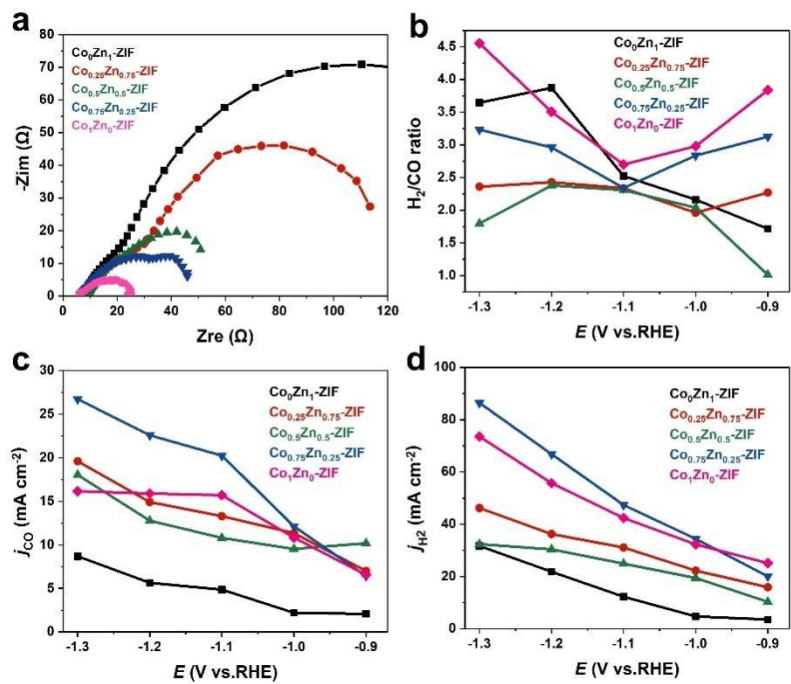

**Fig. S9** (a) Nyquist curves ( $-0.65$  V vs. RHE), (b) H<sub>2</sub>/CO ratio, (c)  $j_{CO}$  and (d)  $j_{H_2}$ .

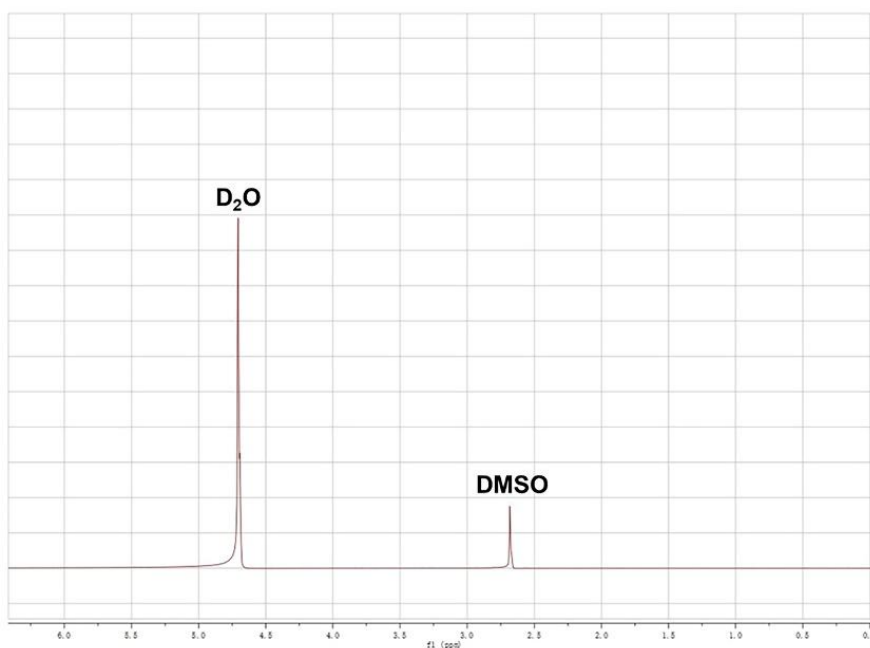

**Fig. S10** <sup>1</sup>H NMR spectra of the electrolyte in the cathode chamber after electrolysis from  $-0.9$  to  $-1.3$  (V vs. RHE) for  $Co_{0.5}Zn_{0.5}$ -ZIF.

**Table S1** ICP-AES data of  $\text{Co}_x\text{Zn}_y\text{-ZIF}$ .

| Catalyst                                      | Zn (wt%) | Co (wt%) |
|-----------------------------------------------|----------|----------|
| $\text{Co}_0\text{Zn}_1\text{-ZIF}$           | 39.30    | /        |
| $\text{Co}_{0.25}\text{Zn}_{0.75}\text{-ZIF}$ | 25.47    | 6.77     |
| $\text{Co}_{0.5}\text{Zn}_{0.5}\text{-ZIF}$   | 16.37    | 14.24    |
| $\text{Co}_{0.75}\text{Zn}_{0.25}\text{-ZIF}$ | 7.98     | 20.19    |
| $\text{Co}_1\text{Zn}_0\text{-ZIF}$           | /        | 29.04    |

**Table S2** EDS data of  $\text{Co}_x\text{Zn}_y\text{-ZIF}$ .

| Catalyst                                      | Zn (wt%) | Co (wt%) | N (wt%) | C (wt%) |
|-----------------------------------------------|----------|----------|---------|---------|
| $\text{Co}_0\text{Zn}_1\text{-ZIF}$           | 11.4     | /        | 23.74   | 64.86   |
| $\text{Co}_{0.25}\text{Zn}_{0.75}\text{-ZIF}$ | 5.28     | 1.35     | 21.13   | 72.23   |
| $\text{Co}_{0.5}\text{Zn}_{0.5}\text{-ZIF}$   | 4.00     | 3.54     | 22.07   | 70.38   |
| $\text{Co}_{0.75}\text{Zn}_{0.25}\text{-ZIF}$ | 3.94     | 9.66     | 26.30   | 60.10   |
| $\text{Co}_1\text{Zn}_0\text{-ZIF}$           | /        | 11.93    | 26.56   | 61.51   |

**Table S3** The N content of  $\text{Co}_x\text{Zn}_y\text{-ZIF}$ .

| Catalyst                                      | N (wt%) |
|-----------------------------------------------|---------|
| $\text{Co}_0\text{Zn}_1\text{-ZIF}$           | 24.24   |
| $\text{Co}_{0.25}\text{Zn}_{0.75}\text{-ZIF}$ | 24.68   |
| $\text{Co}_{0.5}\text{Zn}_{0.5}\text{-ZIF}$   | 24.55   |
| $\text{Co}_{0.75}\text{Zn}_{0.25}\text{-ZIF}$ | 25.08   |
| $\text{Co}_1\text{Zn}_0\text{-ZIF}$           | 24.91   |

**Table S4** Comparison of the performance of the catalysts in this work with that of the reported excellent literature on syngas production.

| Catalyst                                      | Electrolyte           | Cell type | $E$ (V vs. RHE) | $\text{H}_2/\text{CO}$ ratio | $E$ (V vs. RHE) | $j_{\text{total}}$ (mA $\text{cm}^{-2}$ ) | Ref.      |
|-----------------------------------------------|-----------------------|-----------|-----------------|------------------------------|-----------------|-------------------------------------------|-----------|
| <b>ZIFs-based MOFs</b>                        |                       |           |                 |                              |                 |                                           |           |
| $\text{Co}_{0.5}\text{Zn}_{0.5}\text{-ZIF}$   | 0.5 M $\text{KHCO}_3$ | H type    | -0.9            | 1.0                          | -0.9            | -26                                       | This work |
| $\text{Co}_{0.25}\text{Zn}_{0.75}\text{-ZIF}$ | 0.5 M $\text{KHCO}_3$ | H type    | -1              | 2.0                          | /               | /                                         | This work |
| $\text{Co}_{0.75}\text{Zn}_{0.25}\text{-ZIF}$ | 0.5 M $\text{KHCO}_3$ | H type    | -1.2            | 3.0                          | /               | /                                         | This work |

|                                    |                         |        |              |     |      |       | work |
|------------------------------------|-------------------------|--------|--------------|-----|------|-------|------|
| 10%Ag-ZIF-8                        | 0.5 M KHCO <sub>3</sub> | H type | -1.1         | 0.4 | -1.1 | -2.6  | 5    |
| 10%Ag-ZIF-8                        | 1M KOH                  | H type | -0.9         | 0.3 | -0.9 | -28   | 5    |
| F-Cu <sub>2</sub> O@ZIF-8          | 0.1M KHCO <sub>3</sub>  | H type | -0.7         | 2.0 | -0.7 | -1.25 | 6    |
| F-Cu <sub>2</sub> O@ZIF-8          | 0.1 M KHCO <sub>3</sub> | H type | -0.9         | 0.2 | -0.9 | -6.25 | 6    |
| F-Cu <sub>2</sub> O@ZIF-8          | 0.1 M KHCO <sub>3</sub> | H type | -1.0         | 0.2 | -1.3 | -17   | 6    |
| Cu <sub>ZIF</sub>                  | /                       | /      | -1.5         | 0.5 | -1.5 | -0.8  | 7    |
| <b>ZIF-derived SACs</b>            |                         |        |              |     |      |       |      |
| Co-HNC                             | 0.1 M KHCO <sub>3</sub> | /      | -0.9         | 2.0 | -1.4 | -25   | 8    |
| Co-HNC                             | 0.1 M KHCO <sub>3</sub> | /      | -1.0         | 2.0 | /    | /     | 8    |
| C-Fe-Co-ZIF<br>1.6 wt% Fe          | 0.5 M KHCO <sub>3</sub> | H type | -0.8         | 3.4 | /    | /     | 9    |
| C-Co-ZIF HM<br>15min               | 0.5 M KHCO <sub>3</sub> | H type | -0.8         | 2.3 | /    | /     | 10   |
| C-Co-ZIF HM<br>15min               | 0.5 M KHCO <sub>3</sub> | H type | -0.7         | 1.0 | /    | /     | 10   |
| FeN <sub>4</sub> C                 | 0.1 M KHCO <sub>3</sub> | H type | -0.8         | 2.5 | /    | /     | 11   |
| <b>Other SACs</b>                  |                         |        |              |     |      |       |      |
| Ni-Fe DASs<br>(3:1)                | 0.5 M KHCO <sub>3</sub> | /      | -1.1         | 1.0 | -0.7 | -20   | 12   |
| Ni-Fe DASs<br>(2:2)                | 0.5 M KHCO <sub>3</sub> | /      | -1.1         | 0.5 | -0.7 | -20   | 12   |
| Ni-Fe DASs<br>(1:3)                | 0.5 M KHCO <sub>3</sub> | /      | -1.1         | 3.1 | /    | /     | 12   |
| Ni, Fe-hG                          | 0.1 M KHCO <sub>3</sub> | H type | -0.6 to -1.1 | 1.0 | /    | /     | 13   |
| Ni-hG/Fe-hG                        | 0.1 M KHCO <sub>3</sub> | H type | -0.6 to -1.1 | 1.0 | /    | /     | 13   |
| Ni-hG/Fe-hG                        | 0.1 M KHCO <sub>3</sub> | Com'l  | 2.5          | 3   | 2.5  | 55    | 13   |
| <b>ZIF-derived materials</b>       |                         |        |              |     |      |       |      |
| 10-Co <sub>2</sub> L@ZIF-<br>8-850 | 0.1 M KHCO <sub>3</sub> | H type | -1.0         | 2.0 | -0.8 | 20    | 14   |
| 10-Co <sub>2</sub> L@ZIF-<br>8-850 | 0.1 M KHCO <sub>3</sub> | H type | /            | /   | -1.0 | 31.7  | 14   |
| Cu <sub>ZIF</sub> -500             | /                       | /      | -1.1         | 3.0 | -1.5 | 0.75  | 7    |
| Cu <sub>ZIF</sub> -500             | /                       | /      | -1.3         | 2.0 | -1.5 | 0.75  | 7    |
| Cu <sub>ZIF</sub> -500             | /                       | /      | -1.5         | 1.0 | -1.5 | 0.75  | 7    |
| Cu <sub>ZIF</sub> -700             | /                       | /      | -1.1         | 4.0 | -1.5 | 0.25  | 7    |
| Cu <sub>ZIF</sub> -700             | /                       | /      | -1.5         | 2.0 | /    | /     | 7    |
| Cu <sub>ZIF</sub> -900             | /                       | /      | -1.5         | 3.0 | -1.5 | 3.0   | 7    |



|                        |                         |        |      |     |       |       |    |
|------------------------|-------------------------|--------|------|-----|-------|-------|----|
| Fe/FeN <sub>4</sub> C  | 0.1 M KHCO <sub>3</sub> | H type | -0.8 | 7.1 | -0.8  | 39.33 | 11 |
| <b>Other materials</b> |                         |        |      |     |       |       |    |
| UNCNs-900              | 0.1 M KHCO <sub>3</sub> | H type | -0.9 | 1.0 | -0.9  | 3.0   | 15 |
| UNCNs-900              | 0.1 M KHCO <sub>3</sub> | H type | -1.1 | 2.0 | -1.1  | 7.5   | 15 |
| 10 nm Au               | 0.5 M KHCO <sub>3</sub> | H type | -0.9 | 3.0 | /     | /     | 16 |
| 8 nm Au                | 0.5 M KHCO <sub>3</sub> | H type | -0.9 | 9.0 | -0.87 | 17.5  | 16 |

## References

- [1] T. Wang, Q. Zhang, K. Lian, G. Qi, Q. Liu, L. Feng, G. Hu, J. Luo and X. Liu, *J. Colloid Interface Sci.*, 2024, **655**, 176–186.
- [2] J. H. Cho, C. Lee, S. H. Hong, H. Y. Jang, S. Back, M. g. Seo, M. Lee, H. K. Min, Y. Choi and Y. J. Jang, *Adv. Mater.*, 2022, **35**, 2208224.
- [3] F. Lyu, W. Hua, H. Wu, H. Sun, Z. Deng and Y. Peng, *Chin. J. Catal.*, 2022, **43**, 1417–1432.
- [4] S. Liang, T. Zhang, Y. Zheng, T. Xue, Z. Wang, Q. Wang and H. He, *Appl. Catal., B*, 2023, **333**, 122801.
- [5] M. Usman and M. H. Suliman, *Catalysts*, 2023, **13**, 867.
- [6] H. Luo, B. Li, J. G. Ma and P. Cheng, *Angew. Chem. Int. Ed.*, 2022, **61**, e202116736.
- [7] S. Cui, C. Yu, X. Tan, H. Huang, X. Yao and J. Qiu, *ACS Sustainable Chem. Eng.*, 2020, **8**, 3328–3335.
- [8] X. Song, H. Zhang, Y. Yang, B. Zhang, M. Zuo, X. Cao, J. Sun, C. Lin, X. Li and Z. Jiang, *Adv. Sci.*, 2018, **5**, 1800177.
- [9] Z. Chen, G. Zhang, Y. Wen, N. Chen, W. Chen, T. Regier, J. Dynes, Y. Zheng and S. Sun, *Nano-Micro Lett.*, 2022, **14**, 25.
- [10] Z. Chen, G. Zhang, Q. Hu, Y. Zheng, S. Cao, G. Chen, C. Li, T. Boyko, N. Chen and W. Chen, *Small Struct.*, 2022, **3**, 2200031.
- [11] Y. Hua, B. Zhang, W. Hao and Z. Gao, *Cell Rep. Phys. Sci.*, 2022, **3**, 100703.
- [12] L. Wang, X. Gao, S. Wang, C. Chen, J. Song, X. Ma, T. Yao, H. Zhou and Y. Wu, *J. Am. Chem. Soc.*, 2023, **145**, 13462–13468.
- [13] J. Leverett, R. Daiyan, L. Gong, K. Iputera, Z. Tong, J. Qu, Z. Ma, Q. Zhang, S. Cheong and J. Cairney, *ACS Nano*, 2021, **15**, 12006–12018.
- [14] W. Yang, J.-H. Zhang, R. Si, L.-M. Cao, D.-C. Zhong and T.-B. Lu, *Inorg. Chem. Front.*, 2021, **8**, 1695–1701.
- [15] B. Wei, J. Hao, B. Ge, W. Luo, Y. Chen, Y. Xiong, L. Li and W. Shi, *J. Colloid Interface Sci.*, 2022, **608**, 2650–2659.
- [16] W. Zhu, R. Michalsky, O. n. Metin, H. Lv, S. Guo, C. J. Wright, X. Sun, A. A. Peterson and S. Sun, *J. Am. Chem. Soc.*, 2013, **135**, 16833–16836.
